# Supplementary material for: V2O5 embedded in vertically aligned carbon nanotube arrays as free-standing electrodes for flexible supercapacitors
Source: Royal Society of Chemistry journal article supplement (doi:10.1039/c7ta07727k), 2017-01-01
Supplement: c7ta07727k1.pdf [file c7ta07727k1.pdf]

1 Electronic Supplementary Materials (ESI) for Journal of Materials Chemistry A  
2 The journal is © The Royal Society of Chemistry 2017

3

4

5 **Electronic Supplementary Information for**

6

7

8 **V<sub>2</sub>O<sub>5</sub> Embedded in Vertically Aligned Carbon Nanotube Arrays as**

9 **Free-standing Electrodes for Flexible Supercapacitors**

10 Haifeng Jiang,<sup>a</sup> Xiaoyi Cai,<sup>b</sup> Yao Qian,<sup>a</sup> Chunyan Zhang,<sup>a</sup> Lijun Zhou,<sup>a</sup> Weilan Liu,<sup>a</sup> Baosheng Li,<sup>a</sup> Linfei  
11 Lai<sup>\*a</sup> and Wei Huang<sup>\*a</sup>

12

13 a. Key Laboratory of Flexible Electronics (KLOFE) & Institute of Advanced Materials (IAM), Jiangsu  
14 National Synergistic Innovation Center for Advanced Materials (SICAM), Nanjing Tech University, 5  
15 XinMofan Road, Nanjing 210009, P.R.China. E-mail: iamflai@njtech.edu.cn;  
16 iamwhuang@njtech.edu.cn

17 b. School of Physical and Mathematical Sciences, Nanyang Technological University, 21 Nanyang  
18 Link, Singapore 637371, Singapore

19

20

21 **\*Corresponding Authors**

22 Linfei Lai ([iamflai@njtech.edu.cn](mailto:iamflai@njtech.edu.cn)) and Wei Huang ([iamwhuang@njtech.edu.cn](mailto:iamwhuang@njtech.edu.cn))

23

24

## 1 Calculations

2 The methods used to calculate the specific capacitances, energy density and  
3 power density are listed below.

4 The specific capacitance of single electrodes can be calculated from their CV  
5 curves according to the following equation 1:

$$C = \frac{\int idU}{2vm\Delta U} (F/g) \quad (1)$$

7 The capacitance can also be collected from the charge discharge curves in  
8 equation 2:

$$C = \frac{i \times \Delta t}{m \times \Delta U} (F/g) \quad (2)$$

10 Where  $i$  is the discharge current,  $\Delta U$  is the potential window,  $v$  is the scan rate,  $m$  is  
11 the loading of active material, and  $\Delta t$  is the discharge time.

12 The total specific capacitance ( $C_c$  for cathode capacitance and  $C_a$  for anode  
13 capacitance) in the full cell was calculated according the equation 1 and 2 with being  
14 the total weight of cathode and anode active material. For full cells the positive charge  
15 and negative charge were balanced ( $q^+=q^-$ ). The charge stored can be calculated from  
16 the equation 3:

$$q = C_c(C_a) \times m^+(m^-) \times \Delta U_a(\Delta U_c) \quad (3)$$

18 Where  $\Delta U_a$  is the potential window of cathode and  $\Delta U_c$  is the potential range for  
19 anode electrode.

20 The mass loading ratio of both electrodes is obtained from the equation 3 from  
21 the CP average specific capacitance:

$$\frac{m^+}{m^-} = \frac{C_a \times \Delta U_a}{C_c \times \Delta U_c} = \frac{1}{4.06} \quad (4)$$

23 The energy and power density of full cell were calculated from the following  
24 equation 5 and 6:

$$E = \frac{\int_{U_{min}}^{U_{max}} IdU}{3.6 \times m} = \frac{I \int_{t=0}^{t=t} U(t)dt}{3.6 \times m} (Wh/kg) \quad (5)$$

26

$$P = \frac{E}{t} (W/kg) \quad (6)$$

27

28

29

30

31

32

33

1  
2

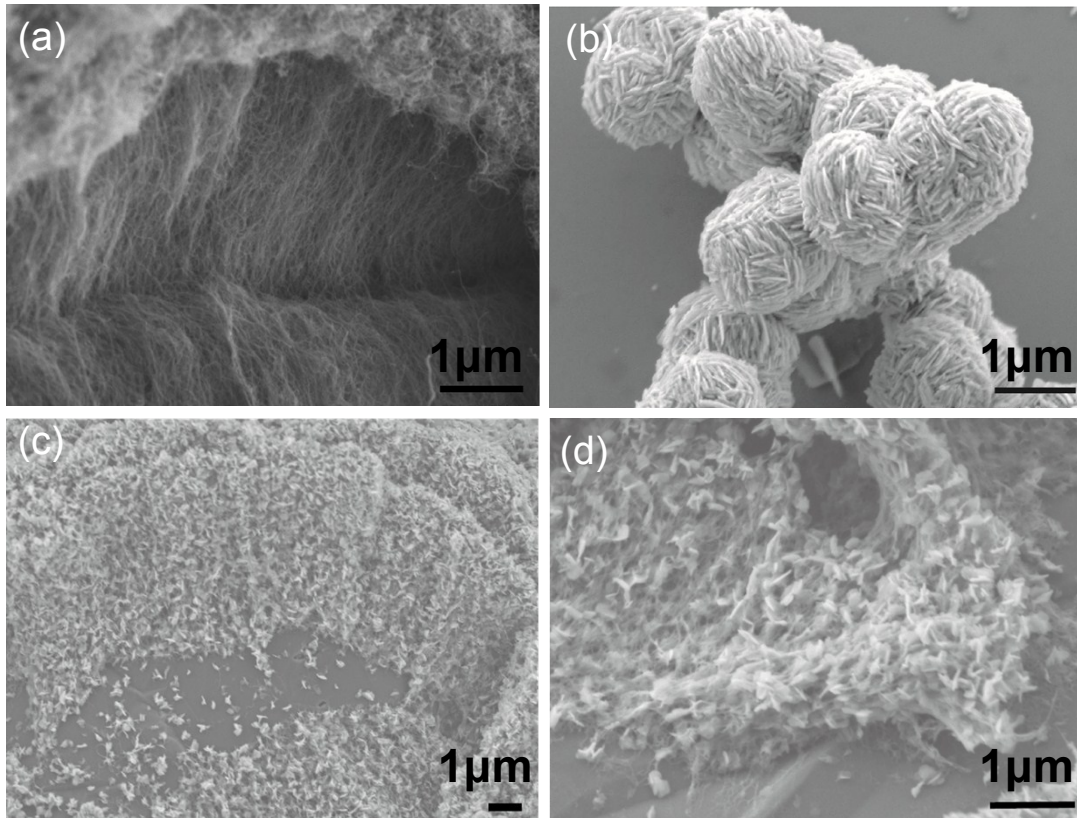

3  
4  
5  
6  
7  
8  
9

Fig. S 1 SEM image of (a) VA-CNT/GF (b) V<sub>2</sub>O<sub>5</sub> powder without VA-CNTs/GF (c) V<sub>2</sub>O<sub>5</sub>-VA-CNTs /GF and (d) PEDOT-V<sub>2</sub>O<sub>5</sub>-VA-CNTs/GF

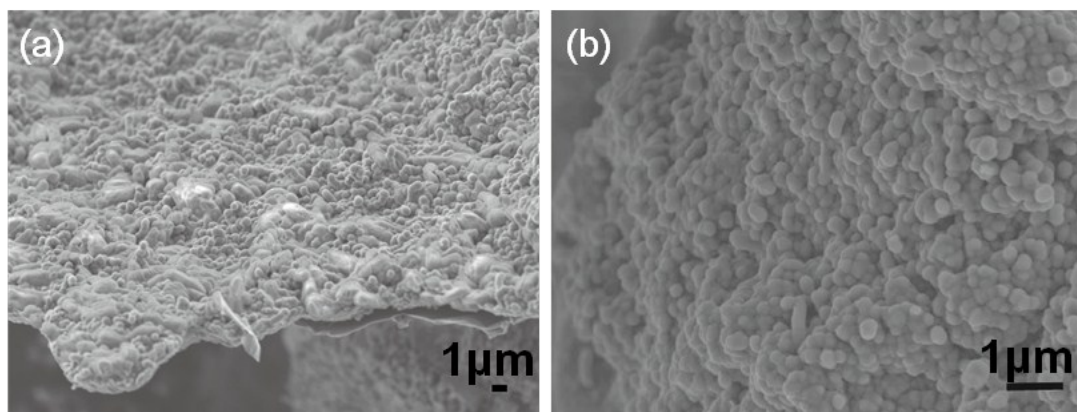

10  
11  
12

Fig. S 2 (a) and (b) SEM image of PPy-VA-CNTs/GF

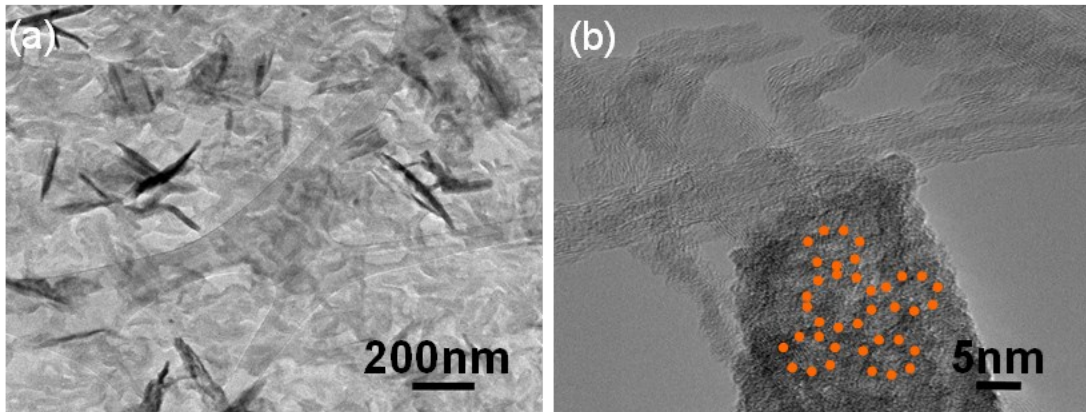

1  
 2 Fig. S 3 (a) TEM characterization of  $V_2O_5$ -VA-CNTs/GF and (b) HRTEM image of  $V_2O_5$ -VA-CNTs /GF  
 3  
 4  
 5

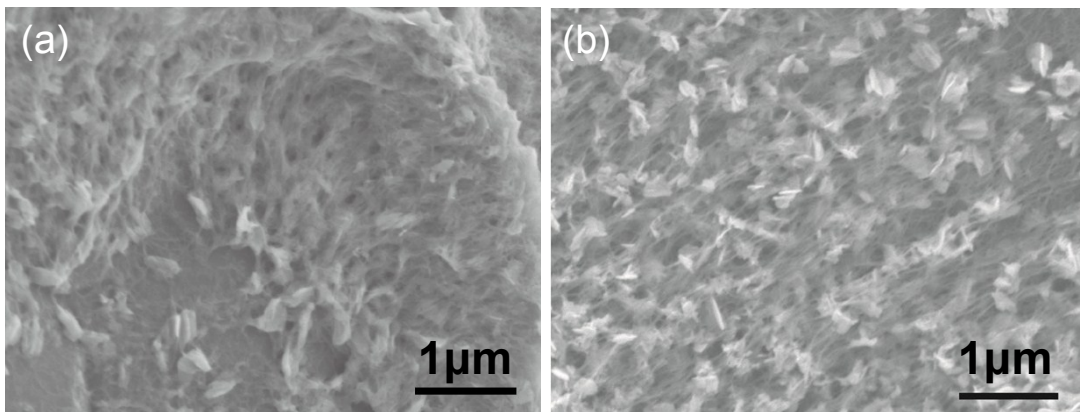

6  
 7 Fig. S 4 SEM image of (a)  $V_2O_5$ -VA-CNTs/GF (b) and PEDOT- $V_2O_5$ -VA-CNTs/GF after cyclic  
 8 voltammetry and chronopotentiometry  
 9  
 10  
 11  
 12

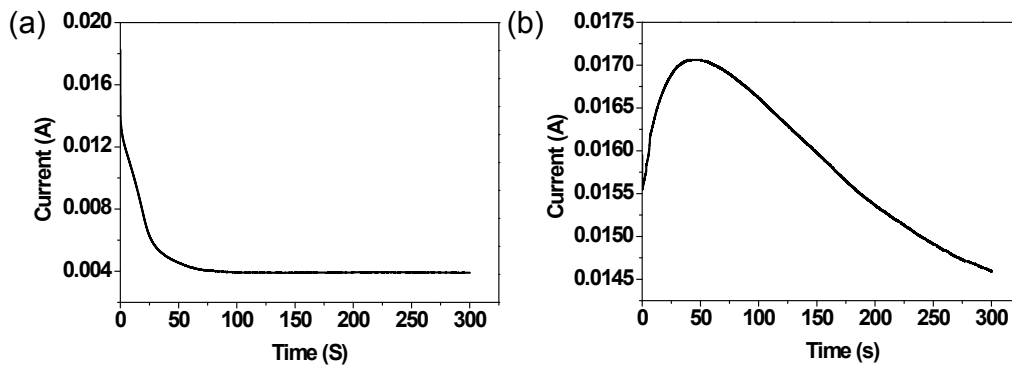

13  
 14 Fig. S 5 (a) PEDOT was coated onto the  $V_2O_5$ -VA-CNTs/GF by electrodeposition (b) PPy was  
 15 electrochemically deposited on VA-CNTs/GF by chronoamperometry technique  
 16

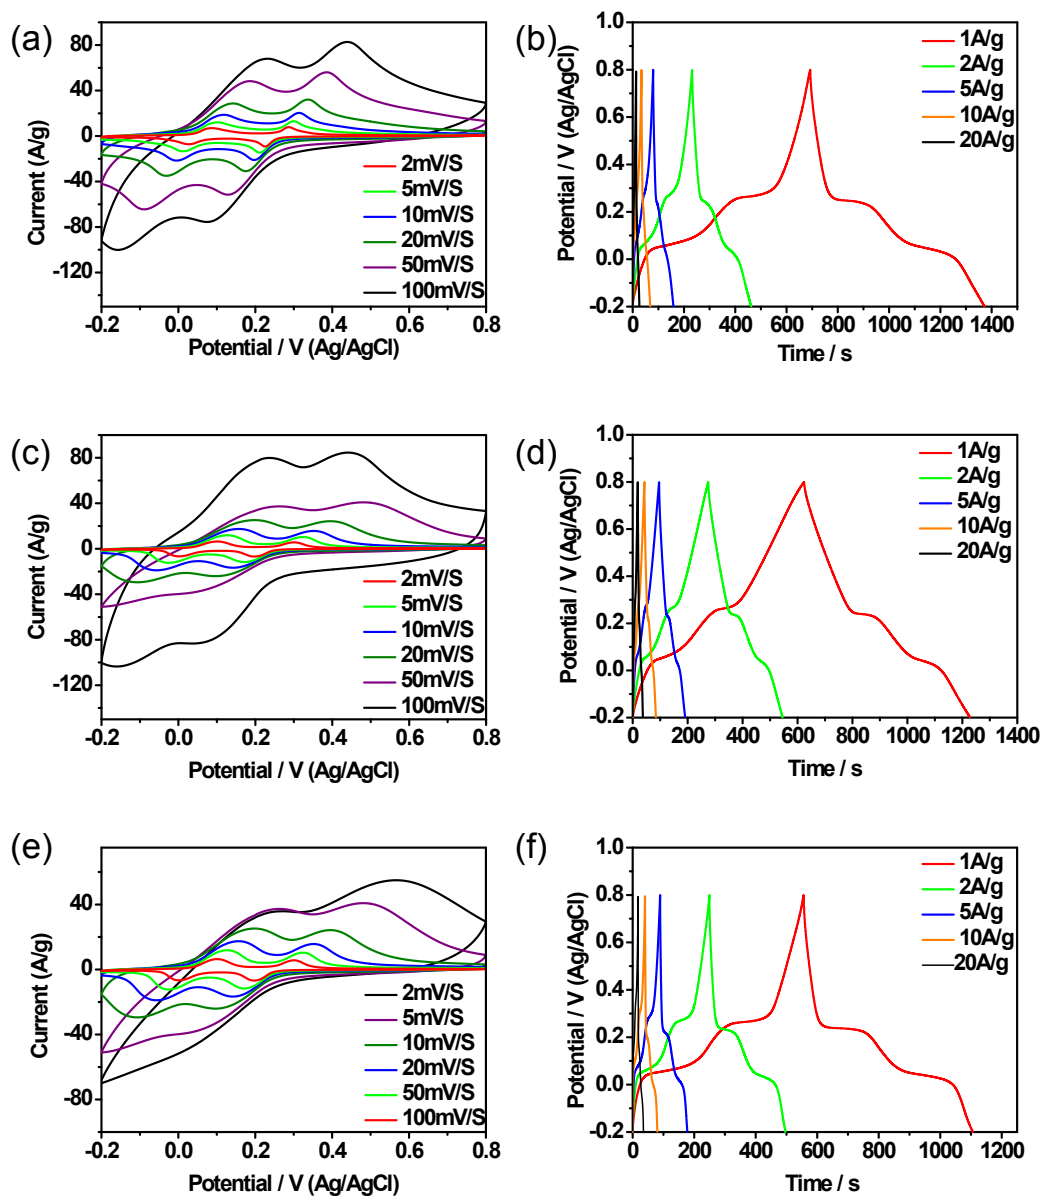

1

2 Fig. S 6 (a) (c) and (e) CV curve of  $V_2O_5$ -VA-CNTs/GF, PEDOT- $V_2O_5$  and  $V_2O_5$  powder at different scan

3 rates (b) (d) and (f) Charge-discharge curves of  $V_2O_5$ -VA-CNTs/GF, PEDOT- $V_2O_5$  and  $V_2O_5$  powder at

4 different current densities

5

6

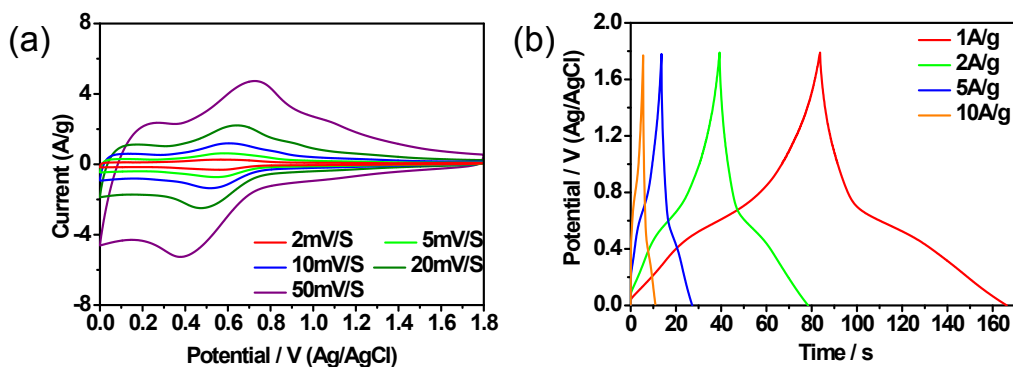

1

2 Fig. S 7 (a) CV curves of the device in 5 mol L<sup>-1</sup> LiNO<sub>3</sub> aqueous solution at various scan rates from  
 3 2mV s<sup>-1</sup> to 100mV s<sup>-1</sup>. (b) Charge/discharge curves of the device in 5 mol L<sup>-1</sup> LiNO<sub>3</sub> aqueous solution at  
 4 different current densities from 1 A g<sup>-1</sup> to 20 A g<sup>-1</sup>

5

6

7

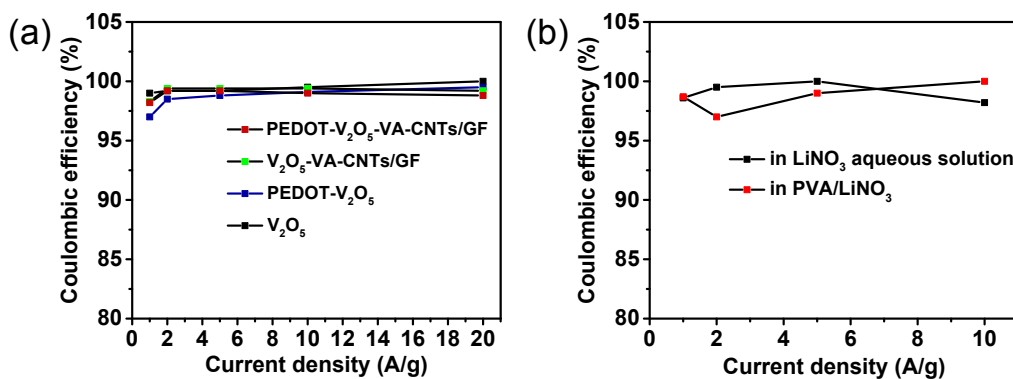

8

9 Fig. S 8 (a) The coulombic efficiency of PEDOT-V<sub>2</sub>O<sub>5</sub>-VA-CNTs/GF, V<sub>2</sub>O<sub>5</sub>-VA-CNTs/GF, PEDOT-V<sub>2</sub>O<sub>5</sub>  
 10 and V<sub>2</sub>O<sub>5</sub> powder at different current densities (b) The corresponding coulombic efficiency of the  
 11 device in 5 mol L<sup>-1</sup> LiNO<sub>3</sub> aqueous solution and 5 mol L<sup>-1</sup> PVA/LiNO<sub>3</sub> electrolyte from 1 A g<sup>-1</sup> to 10 A g<sup>-1</sup>

12

13

14

15

16

17

18

19

20

21

22

23

24

**Table S1** a collected electrochemical performance of V<sub>2</sub>O<sub>5</sub> for supercapacitor

| Active materials                                                              | electrolyte                                                            | Specific capacitance                               | Devices' Energy density and powder density           |
|-------------------------------------------------------------------------------|------------------------------------------------------------------------|----------------------------------------------------|------------------------------------------------------|
| PEDOT-V <sub>2</sub> O <sub>5</sub> -VA-CNT/GF flexible electrode (this work) | 5 M LiNO <sub>3</sub> /PVA                                             | 1016 F g <sup>-1</sup> at 1 A g <sup>-1</sup>      | 21.97 Wh kg <sup>-1</sup> at 900 W kg <sup>-1</sup>  |
| V <sub>2</sub> O <sub>5</sub> nanowires/ GO flexible electrode <sup>1</sup>   | 1 M Lithium bis(tri-fluoromethanesulfonimide) (LiTFSi) in acetonitrile |                                                    | 38.8 Wh kg <sup>-1</sup> at 465 W kg <sup>-1</sup>   |
| V <sub>2</sub> O <sub>5</sub> /polyaniline <sup>2</sup>                       | 5M LiCl                                                                | 443 F g <sup>-1</sup> at 2 A g <sup>-1</sup>       | 69.2 Wh kg <sup>-1</sup> at 720 W kg <sup>-1</sup>   |
| V <sub>2</sub> O <sub>5</sub> /Ketjin black <sup>3</sup>                      | LiCl/PVA                                                               | 3.9506 F•cm <sup>-2</sup> at 5 mA•cm <sup>-2</sup> | 56.83 Wh kg <sup>-1</sup> at 303W kg <sup>-1</sup>   |
| V <sub>2</sub> O <sub>5</sub> -rGO free-standing electrodes <sup>4</sup>      | 1 M LiClO <sub>4</sub> in PC                                           | 129.7 F g <sup>-1</sup> at 0.1 A g <sup>-1</sup>   | 13.3 Wh kg <sup>-1</sup> at 12.5 W kg <sup>-1</sup>  |
| V <sub>2</sub> O <sub>5</sub> /PEDOT/MnO <sub>2</sub> <sup>5</sup>            | 1 M Na <sub>2</sub> SO <sub>4</sub>                                    | 266.4 F g <sup>-1</sup> at 2 mV s <sup>-1</sup>    | 21.7 Wh kg <sup>-1</sup> at 2.2 KW kg <sup>-1</sup>  |
| VO <sub>2</sub> /GF self-standing electrode <sup>6</sup>                      | K <sub>2</sub> SO <sub>4</sub>                                         | 485 F g <sup>-1</sup> at 2 A g <sup>-1</sup>       | --                                                   |
| V <sub>2</sub> O <sub>5</sub> /polypyrrole <sup>7</sup>                       | 5 M LiNO <sub>3</sub> /PVA                                             | 448 F g <sup>-1</sup> at 0.5 A g <sup>-1</sup>     | 14.2 Wh kg <sup>-1</sup> at 250 W kg <sup>-1</sup>   |
| V <sub>2</sub> O <sub>5</sub> /rGO <sup>8</sup>                               | 1 M KCl                                                                | 635 F g <sup>-1</sup> at 1 A g <sup>-1</sup>       | 39 Wh kg <sup>-1</sup> at 900 W kg <sup>-1</sup>     |
| Flexible MWNT/V <sub>2</sub> O <sub>5</sub> <sup>9</sup>                      | LiNO <sub>3</sub> /PVA                                                 | 80 F cm <sup>-2</sup> at 10 mV s <sup>-1</sup>     | 6.8 mWh cm <sup>-3</sup> at 80.0 W cm <sup>-3</sup>  |
| V <sub>2</sub> O <sub>5</sub> /MWCNT/GO <sup>10</sup>                         | 2 M KCl/LiClO <sub>4</sub>                                             | 2590 F g <sup>-1</sup> at 1mV s <sup>-1</sup>      | 96 Wh kg <sup>-1</sup> at 800 W kg <sup>-1</sup>     |
| V <sub>2</sub> O <sub>5</sub> nanofibre/ graphene <sup>11</sup>               | 1 M LiTFSi                                                             | 218 F g <sup>-1</sup> at 1 A g <sup>-1</sup>       | 37.2 Wh kg <sup>-1</sup> at 3743 W kg <sup>-1</sup>  |
| Spherical V <sub>2</sub> O <sub>5</sub> <sup>12</sup>                         | 5 M LiNO <sub>3</sub>                                                  | 559 F g <sup>-1</sup> at 3 A g <sup>-1</sup>       | --                                                   |
| VO <sub>x</sub> nanowire <sup>13</sup>                                        | LiCl/PVA                                                               | 298.5 F g <sup>-1</sup> at 10 mV s <sup>-1</sup>   | 0.61 mWh cm <sup>-3</sup> at 0.85 W cm <sup>-3</sup> |

|                                                                              |                                      |                                                    |                                                      |
|------------------------------------------------------------------------------|--------------------------------------|----------------------------------------------------|------------------------------------------------------|
| V <sub>2</sub> O <sub>5</sub> /polyindole <sup>14</sup>                      | 5 M LiNO <sub>3</sub>                | 535.5 F g <sup>-1</sup> at 1 A g <sup>-1</sup>     | 38.7 Wh kg <sup>-1</sup> at 900 W kg <sup>-1</sup>   |
| V <sub>2</sub> O <sub>5</sub> / MWCNT <sup>15</sup>                          | 0.5 M K <sub>2</sub> SO <sub>4</sub> | 410 F g <sup>-1</sup> at 0.5 A g <sup>-1</sup>     | 57 Wh kg <sup>-1</sup> at 250 W kg <sup>-1</sup>     |
| VO <sub>2</sub> nanoflake self-standing electrode <sup>6</sup>               | K <sub>2</sub> SO <sub>4</sub>       | 485 F g <sup>-1</sup> at 2 A g <sup>-1</sup>       | 9.2 Wh kg <sup>-1</sup> at 11.5 W kg <sup>-1</sup>   |
| MnO <sub>2</sub> -GO/V <sub>2</sub> O <sub>5</sub> -GO <sup>16</sup>         | 1 M LiTFSI in acetonitrile           | 13 F g <sup>-1</sup> at 500 mA g <sup>-1</sup>     | 15.4 Wh kg <sup>-1</sup> at 436.5 W kg <sup>-1</sup> |
| Graphite mamoplatelets-V <sub>2</sub> O <sub>5</sub> <sup>17</sup>           | 1 M LiTFSI                           | 226 F g <sup>-1</sup> at 10 mV s <sup>-1</sup>     | 28 Wh kg <sup>-1</sup> at 303 W kg <sup>-1</sup>     |
| V <sub>2</sub> O <sub>5</sub> .0.6H <sub>2</sub> O <sup>18</sup>             | 0.5 M K <sub>2</sub> SO <sub>4</sub> | 180.7 F g <sup>-1</sup> at 2C                      | 20.3 Wh kg <sup>-1</sup> at 2000 W kg <sup>-1</sup>  |
| Graphene/V <sub>2</sub> O <sub>5</sub> xerogels <sup>19</sup>                | 0.5 M K <sub>2</sub> SO <sub>4</sub> | 195.4 F g <sup>-1</sup> at 1 A g <sup>-1</sup>     | ---                                                  |
| 3D V <sub>2</sub> O <sub>5</sub> /hydrogenated-WO <sub>3</sub> <sup>20</sup> | LiCl/PVA                             | 1101 F g <sup>-1</sup> at 6.67 mA cm <sup>-2</sup> | 98 Wh kg <sup>-1</sup> at 1538W kg <sup>-1</sup>     |
| V <sub>2</sub> O <sub>5</sub> nanotube <sup>21</sup>                         | 0.1 M LiTFSI                         | ---                                                | 11.6 Wh kg <sup>-1</sup> at 1200W kg <sup>-1</sup>   |



**Table S2** the specific capacitance of V<sub>2</sub>O<sub>5</sub>, PEDOT-V<sub>2</sub>O<sub>5</sub>, V<sub>2</sub>O<sub>5</sub>-VA-CNT and PEDOT-V<sub>2</sub>O<sub>5</sub>-VA-CNT at differert scan rate

| Scan rate [mV s <sup>-1</sup> ]                                      | 2       | 5                    | 10     | 20     | 50     | 100    |
|----------------------------------------------------------------------|---------|----------------------|--------|--------|--------|--------|
| V <sub>2</sub> O <sub>5</sub> (F g <sup>-1</sup> )                   | 700.36  | 648.71 <sup>1)</sup> | 602.18 | 551.85 | 428.56 | 297.00 |
| PEDOT-V <sub>2</sub> O <sub>5</sub> (F g <sup>-1</sup> )             | 836.88  | 747.45               | 688.76 | 631.53 | 553.56 | 475.24 |
| V <sub>2</sub> O <sub>5</sub> -VA-CNTs/GF (F g <sup>-1</sup> )       | 891.45  | 777.05               | 705.38 | 632.39 | 517.06 | 417.84 |
| PEDOT-V <sub>2</sub> O <sub>5</sub> -VA-CNTs/GF (F g <sup>-1</sup> ) | 1181.44 | 1041.09              | 907.88 | 777.13 | 630.47 | 524.70 |

**Table S3** the capacitance of V<sub>2</sub>O<sub>5</sub>, PEDOT-V<sub>2</sub>O<sub>5</sub>, V<sub>2</sub>O<sub>5</sub>-VA-CNT/GF and PEDOT-V<sub>2</sub>O<sub>5</sub>-VA-CNT/GF at different current densities

| Current densities[A g <sup>-1</sup> ]                                | 1    | 2     | 5     | 10  | 20  |
|----------------------------------------------------------------------|------|-------|-------|-----|-----|
| V <sub>2</sub> O <sub>5</sub> (F g <sup>-1</sup> )                   | 550  | 494.8 | 442.5 | 400 | 350 |
| PEDOT-V <sub>2</sub> O <sub>5</sub> (F g <sup>-1</sup> )             | 604  | 541.8 | 474   | 421 | 368 |
| V <sub>2</sub> O <sub>5</sub> -VA-CNTs/GF (F g <sup>-1</sup> )       | 627  | 545.2 | 480.5 | 435 | 376 |
| PEDOT-V <sub>2</sub> O <sub>5</sub> -VA-CNTs/GF (F g <sup>-1</sup> ) | 1016 | 898   | 763.5 | 611 | 484 |

## References:

1. S. D. Perera, A. D. Liyanage, N. Nijem, J. P. Ferraris, Y. J. Chabal and K. J. Balkus, *J. Power Sources*, 2013, **230**, 130-137.
2. M.-H. Bai, T.-Y. Liu, F. Luan, Y. Li and X.-X. Liu, *J. Mater. Chem. A*, 2014, **2**, 10882.
3. T. Peng, J. Wang, Q. Liu, J. Liu and P. Wang, *CrystEngComm*, 2015, **17**, 1673-1679.
4. C. Y. Foo, A. Sumboja, D. J. H. Tan, J. Wang and P. S. Lee, *Adv. Energy Mater.*, 2014, **4**, 1400236.
5. C. X. Guo, G. Yilmaz, S. Chen, S. Chen and X. Lu, *Nano Energy*, 2015, **12**, 76-87.
6. X. Xia, D. Chao, C. F. Ng, J. Lin, Z. Fan, H. Zhang, Z. X. Shen and H. J. Fan, *Mater. Horiz.*, 2015, **2**, 237-244.
7. T. Qian, N. Xu, J. Zhou, T. Yang, X. Liu, X. Shen, J. Liang and C. Yan, *J. Mater. Chem. A*, 2015, **3**, 488-493.

8. Q. W. D. H. Nagaraju, P. Beaujuge and H. N. Alshareef, *J. Mater. Chem. A*, 2014, **2**.
9. D. Kim, J. Yun, G. Lee and J. S. Ha, *Nanoscale*, 2014, **6**, 12034-12041.
10. I. Shakir, Z. Ali, J. Bae, J. Park and D. J. Kang, *Nanoscale*, 2014, **6**, 4125-4130.
11. J. S. B. a. Arup Choudhury a, Melissa Wunch a, Kap Seung Yang b, John P. Ferraris a, Duck J. Yang, *J. Power Sources*, 2015.
12. J. Yang, T. Lan, J. Liu, Y. Song and M. Wei, *Electrochim. Acta*, 2013, **105**, 489-495.
13. X. Lu, M. Yu, T. Zhai, G. Wang, S. Xie, T. Liu, C. Liang, Y. Tong and Y. Li, *Nano. Lett.*, 2013, **13**, 2628-2633.
14. X. Zhou, Q. Chen, A. Wang, J. Xu, S. Wu and J. Shen, *ACS Appl. Mater. Interfaces*, 2016, **8**, 3776-3783.
15. B. Saravanakumar, K. K. Purushothaman and G. Muralidharan, *RSC Advances*, 2014, **4**, 37437.
16. S. D. Perera, M. Rudolph, R. G. Mariano, N. Nijem, J. P. Ferraris, Y. J. Chabal and K. J. Balkus, *Nano Energy*, 2013, **2**, 966-975.
17. J. S. Bonso, A. Rahy, S. D. Perera, N. Nour, O. Seitz, Y. J. Chabal, K. J. Balkus, J. P. Ferraris and D. J. Yang, *J. Power Sources*, 2012, **203**, 227-232.
18. Q. T. Qu, Y. Shi, L. L. Li, W. L. Guo, Y. P. Wu, H. P. Zhang, S. Y. Guan and R. Holze, *Electrochem. Commun.*, 2009, **11**, 1325-1328.
19. J. Xu, H. Sun, Z. Li, S. Lu, X. Zhang, S. Jiang, Q. Zhu and G. S. Zakharova, *Solid State Ionics*, 2014, **262**, 234-237.
20. F. Wang, Y. Li, Z. Cheng, K. Xu, X. Zhan, Z. Wang and J. He, *Phys. Chem. Chem. Phys.*, 2014, **16**, 12214-12220.
21. S. D. Perera, B. Patel, J. Bonso, M. Grunewald, J. P. Ferraris and K. J. Balkus, Jr., *ACS Appl. Mater. Interfaces*, 2011, **3**, 4512-4517.
